# Supplementary material for: Decoding social intentions in human prehensile actions: Insights from a combined kinematics-fMRI study
Source: PubMed Central journal article supplement (PMC5573299; doi:10.1371/journal.pone.0184008), 2017-08-28
Supplement: pone.0184008.s001.pdf [file pone.0184008.s001.pdf]

## Supporting information

**S1 Table. Single subject kinematic parameters in social condition.**

| Subject | Mov_T | T_Peak_V | T_Peak_A | T_Peak_D | Amp_peak_V | Amp_peak_A | Amp_peak_D | T_max_grip_apert |
|---------|-------|----------|----------|----------|------------|------------|------------|------------------|
| 1       | 852   | 400      | 302      | 601      | 702        | 6211       | 6094       | 631              |
| 2       | 818   | 396      | 279      | 557      | 592        | 5761       | 5721       | 612              |
| 3       | 800   | 387      | 275      | 560      | 643        | 5871       | 5764       | 576              |
| 4       | 798   | 377      | 265      | 541      | 612        | 4345       | 5213       | 631              |
| 5       | 845   | 412      | 312      | 559      | 618        | 6002       | 6212       | 603              |
| 6       | 922   | 437      | 319      | 622      | 588        | 5435       | 5576       | 598              |
| 7       | 794   | 355      | 248      | 513      | 657        | 5876       | 5861       | 509              |
| 8       | 854   | 417      | 307      | 600      | 562        | 5567       | 5987       | 598              |
| 9       | 847   | 423      | 318      | 600      | 582        | 6012       | 5768       | 617              |
| 10      | 786   | 346      | 235      | 531      | 598        | 5324       | 5256       | 641              |
| 11      | 841   | 413      | 306      | 587      | 581        | 4567       | 5934       | 609              |
| 12      | 823   | 411      | 309      | 567      | 602        | 5234       | 5004       | 602              |
| 13      | 881   | 456      | 341      | 618      | 587        | 5878       | 5902       | 561              |
| 14      | 900   | 432      | 309      | 645      | 456        | 5523       | 5873       | 631              |
| 15      | 799   | 387      | 254      | 523      | 581        | 5621       | 5467       | 600              |
| 16      | 764   | 339      | 231      | 562      | 608        | 6543       | 6123       | 584              |
| 17      | 824   | 400      | 287      | 571      | 561        | 5231       | 5854       | 598              |
| 18      | 879   | 378      | 265      | 603      | 434        | 5198       | 6231       | 612              |
| 19      | 842   | 441      | 326      | 632      | 603        | 6021       | 5888       | 548              |
| 20      | 834   | 387      | 296      | 554      | 678        | 6988       | 6732       | 555              |
| 21      | 841   | 418      | 311      | 568      | 512        | 5728       | 5912       | 554              |
| 22      | 900   | 425      | 302      | 546      | 612        | 5112       | 5076       | 552              |
| 23      | 756   | 341      | 254      | 498      | 621        | 5682       | 5567       | 578              |
