# Supplementary material for: Decoding social intentions in human prehensile actions: Insights from a combined kinematics-fMRI study
Source: PubMed Central journal article supplement (PMC5573299; doi:10.1371/journal.pone.0184008), 2017-08-28
Supplement: pone.0184008.s002.pdf [file pone.0184008.s002.pdf]

## Supporting information

S2 Table. Single subject kinematic parameters in individual condition.

| Subject | Mov_T | T_Peak_V | T_Peak_A | T_Peak_D | Amp_peak_V | Amp_peak_A | Amp_peak_D | T_max_grip_apert |
|---------|-------|----------|----------|----------|------------|------------|------------|------------------|
| 1       | 768   | 254      | 207      | 453      | 865        | 8210       | 8123       | 448              |
| 2       | 734   | 328      | 199      | 516      | 701        | 7021       | 7122       | 509              |
| 3       | 698   | 329      | 206      | 458      | 756        | 7256       | 7127       | 446              |
| 4       | 695   | 300      | 211      | 503      | 771        | 7234       | 6212       | 510              |
| 5       | 765   | 299      | 225      | 482      | 768        | 7345       | 6543       | 508              |
| 6       | 856   | 342      | 222      | 482      | 674        | 5889       | 6123       | 500              |
| 7       | 711   | 318      | 197      | 527      | 805        | 6934       | 6424       | 523              |
| 8       | 789   | 316      | 218      | 512      | 775        | 7213       | 6612       | 498              |
| 9       | 741   | 310      | 222      | 502      | 781        | 7213       | 7123       | 511              |
| 10      | 701   | 288      | 205      | 520      | 812        | 8213       | 6423       | 523              |
| 11      | 801   | 298      | 235      | 512      | 745        | 6574       | 6734       | 498              |
| 12      | 754   | 291      | 198      | 520      | 801        | 6621       | 6145       | 512              |
| 13      | 786   | 360      | 243      | 490      | 786        | 7543       | 7498       | 501              |
| 14      | 851   | 352      | 218      | 511      | 691        | 6234       | 6545       | 521              |
| 15      | 705   | 287      | 189      | 502      | 704        | 7127       | 5234       | 462              |
| 16      | 681   | 298      | 188      | 496      | 801        | 7421       | 7325       | 438              |
| 17      | 718   | 341      | 201      | 509      | 687        | 6122       | 7428       | 522              |
| 18      | 821   | 317      | 231      | 500      | 876        | 6134       | 6734       | 541              |
| 19      | 754   | 238      | 142      | 384      | 892        | 7865       | 7777       | 402              |
| 20      | 735   | 309      | 219      | 437      | 954        | 8675       | 8453       | 456              |
| 21      | 781   | 322      | 214      | 521      | 678        | 6847       | 6712       | 509              |
| 22      | 778   | 303      | 238      | 467      | 723        | 5679       | 5734       | 481              |
|         | 642   | 301      | 217      | 458      | 725        | 7234       | 7123       | 458              |
